# Supplementary material for: 6-Hydroxyflavone and Derivatives Exhibit Potent Anti-Inflammatory Activity among Mono-, Di- and Polyhydroxylated Flavones in Kidney Mesangial Cells
Source: PubMed Central journal article supplement (PMC4366162; doi:10.1371/journal.pone.0116409), 2015-03-19
Supplement: pone.0116409.s001.pdf [file pone.0116409.s001.pdf]

| compounds | 6-MeO<br>(192 nM) <sup>b</sup> | 6-AcO<br>(0.60 μM) <sup>b</sup> | 6-HO<br>(1.7 μM) <sup>b</sup> | 4',6-HO<br>(2.0 μM) <sup>b</sup> | 6-NaSO <sub>3</sub> O<br>(2.1 μM) <sup>b</sup> |
|-----------|--------------------------------|---------------------------------|-------------------------------|----------------------------------|------------------------------------------------|
| 0.10 μM   | 109 ± 2 %                      | 107 ± 3 %                       | 108 ± 5 %                     | 98 ± 3 %                         | 100 ± 2 %                                      |
| 1.0 μM    | 83 ± 2 %                       | 105 ± 2 %                       | 117 ± 4 %                     | 105 ± 1 %                        | 106 ± 2 %                                      |
| 10 μM     | 68 ± 1 %                       | 89 ± 2 %                        | 116 ± 3 %                     | 115 ± 5 %                        | 107 ± 4 %                                      |
