# Supplementary material for: 6-Hydroxyflavone and Derivatives Exhibit Potent Anti-Inflammatory Activity among Mono-, Di- and Polyhydroxylated Flavones in Kidney Mesangial Cells
Source: PubMed Central journal article supplement (PMC4366162; doi:10.1371/journal.pone.0116409), 2015-03-19
Supplement: pone.0116409.s002.pdf [file pone.0116409.s002.pdf]

| compounds   | 3,3',7-HO<br>(11 $\mu$ M) <sup>b</sup> | 3,3',4,7-HO<br>(11 $\mu$ M) <sup>b</sup> | resveratrol<br>(11 $\mu$ M) <sup>b</sup> | 4',5-HO<br>(14 $\mu$ M) <sup>b</sup> | 3',4',5',7-HO<br>(15 $\mu$ M) <sup>b</sup> | 3,3',4',5,7-<br>HO<br>(22 $\mu$ M) <sup>b</sup> | 3,7-HO<br>(27 $\mu$ M) <sup>b</sup> | 7,8-HO<br>(47 $\mu$ M) <sup>b</sup> | 7-HO<br>(46 $\mu$ M) <sup>b</sup> |
|-------------|----------------------------------------|------------------------------------------|------------------------------------------|--------------------------------------|--------------------------------------------|-------------------------------------------------|-------------------------------------|-------------------------------------|-----------------------------------|
| 5 $\mu$ M   | 109 $\pm$ 1 %                          | 101 $\pm$ 2 %                            | 106 $\pm$ 2 %                            | 106 $\pm$ 2 %                        | 96 $\pm$ 1 %                               | -                                               | -                                   | -                                   | -                                 |
| 10 $\mu$ M  | 108 $\pm$ 2 %                          | 99 $\pm$ 1 %                             | 104 $\pm$ 2 %                            | 101 $\pm$ 4 %                        | 92 $\pm$ 2 %                               | 94 $\pm$ 2 %                                    | 101 $\pm$ 1 %                       | 100 $\pm$ 2 %                       | 94 $\pm$ 3 %                      |
| 50 $\mu$ M  | 86 $\pm$ 1 %                           | 95 $\pm$ 4 %                             | 106 $\pm$ 1 %                            | 89 $\pm$ 6 %                         | 81 $\pm$ 3 %                               | 80 $\pm$ 5 %                                    | 119 $\pm$ 7 %                       | 88 $\pm$ 3 %                        | 93 $\pm$ 4 %                      |
| 100 $\mu$ M | -                                      | -                                        | -                                        | -                                    | -                                          | 78 $\pm$ 1 %                                    | 74 $\pm$ 1 %                        | 89 $\pm$ 3 %                        | 79 $\pm$ 4 %                      |
