# Supplementary material for: 6-Hydroxyflavone and Derivatives Exhibit Potent Anti-Inflammatory Activity among Mono-, Di- and Polyhydroxylated Flavones in Kidney Mesangial Cells
Source: PubMed Central journal article supplement (PMC4366162; doi:10.1371/journal.pone.0116409), 2015-03-19
Supplement: pone.0116409.s003.pdf [file pone.0116409.s003.pdf]

| compounds         | 100 $\mu$ M   | 200 $\mu$ M    |
|-------------------|---------------|----------------|
| 2',3,4',5,7-HO    | 111 $\pm$ 4 % | 105 $\pm$ 6 %  |
| 3',4',5',5,7-HO   | 86 $\pm$ 3 %  | 107 $\pm$ 4 %  |
| 2',3,4',6-HO      | 114 $\pm$ 1 % | 108 $\pm$ 1 %  |
| 2',3,7,8-HO       | 97 $\pm$ 1 %  | 95 $\pm$ 1 %   |
| 3,3',4',5,7,8-HO  | 78 $\pm$ 2 %  | 81 $\pm$ 5 %   |
| 2'-HO             | 106 $\pm$ 5 % | 103 $\pm$ 3 %  |
| 3-HO              | 93 $\pm$ 2 %  | 104 $\pm$ 12 % |
| 4',5,7-HO         | 95 $\pm$ 5 %  | 88 $\pm$ 4 %   |
| 3,3',4',5',5,7-HO | 78 $\pm$ 1 %  | 81 $\pm$ 3 %   |
| Daidzein          | 92 $\pm$ 2 %  | 86 $\pm$ 5 %   |
